# Supplementary material
Source: MDPI journal article supplement (https://www.mdpi.com/2073-4441/11/11/2232)
Supplement: s2 [file s2]

## 1. Presentation of the tank plans

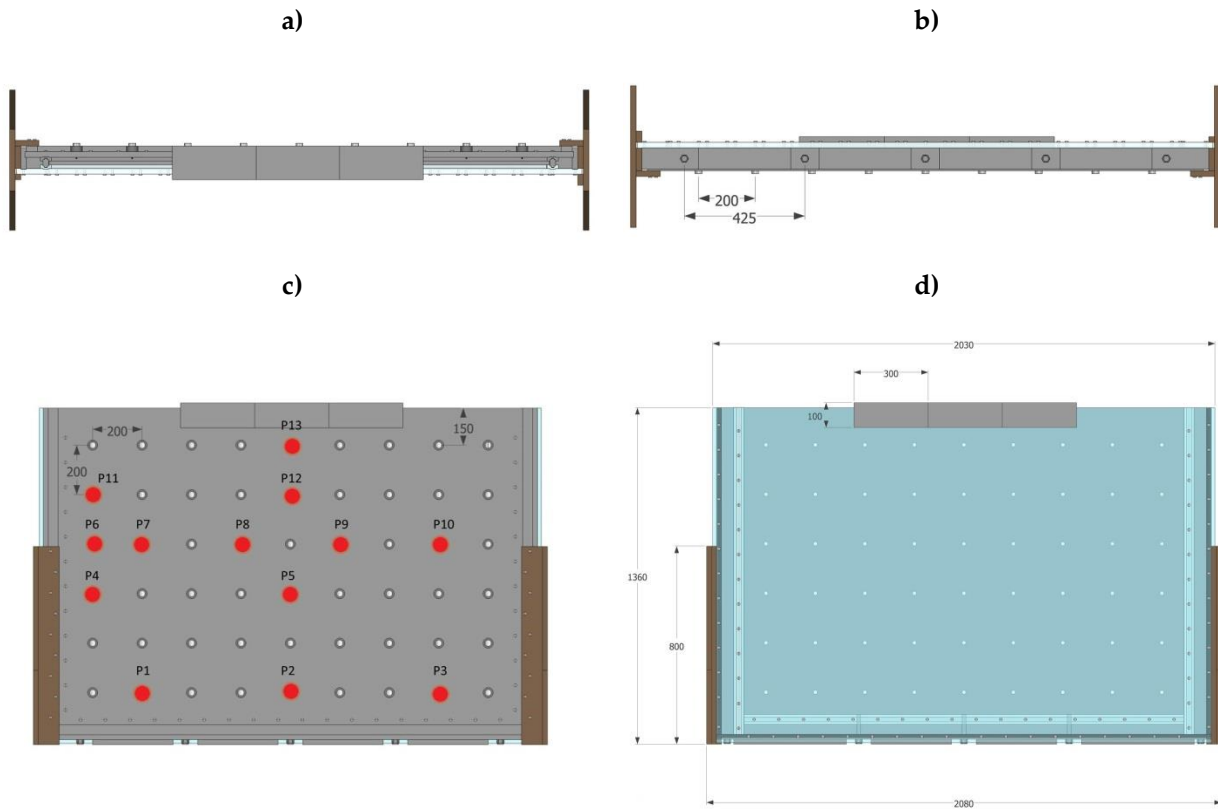

**Figure S1.** Plans of the tank: a) top view, b) bottom view, c) back view and d) front view. Red marks of figure S1 c) refer to pressure sensor locations: P1(300mm;175mm) // P2(900;175) // P3(1500;175) // P4(100;575) // P5(900;575) // P6(100;775) // P7(300;775) // P8(700;775) // P9(1100;775) // P10(1500;775) // P11(100;975) // P12(900;975) // P13(900;1175).

## 2. Pictures of the tank

a)

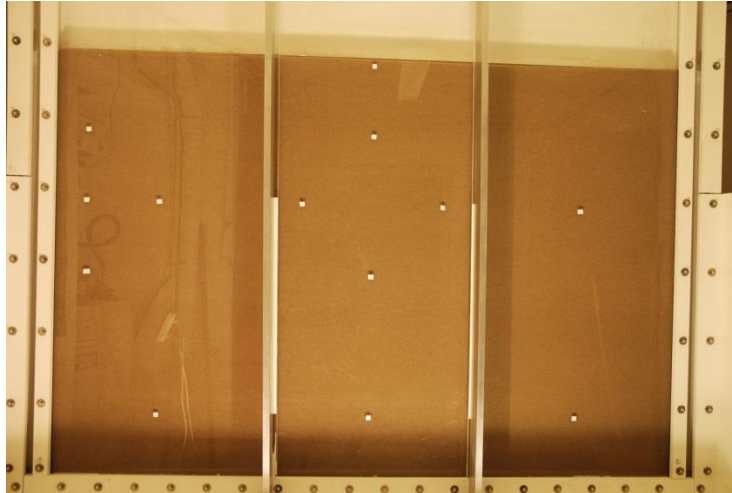

b)

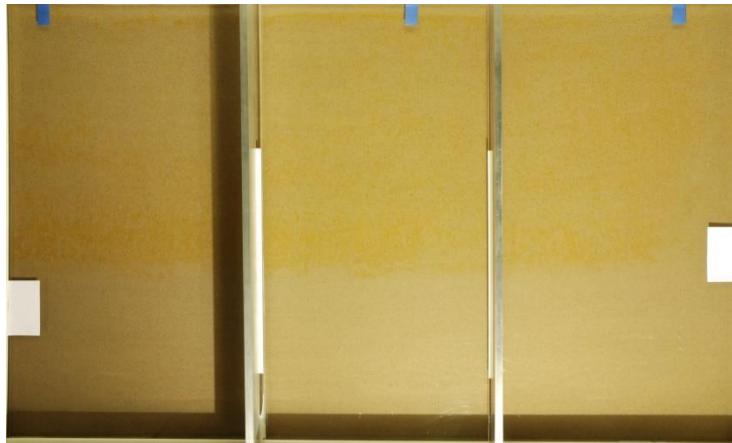

c)

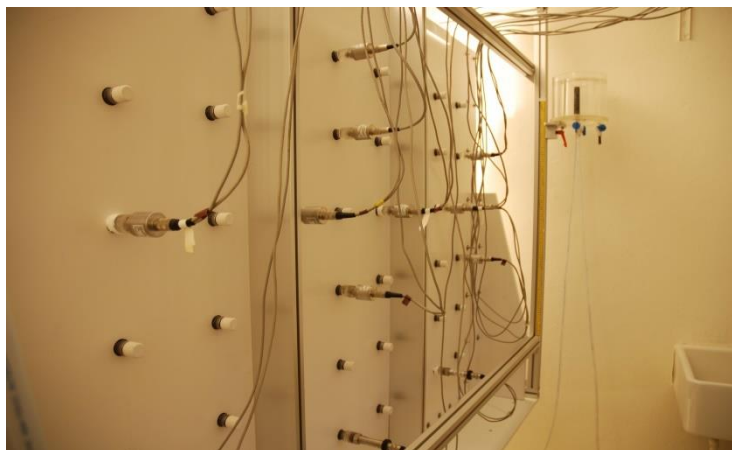

**Figure 2.** Pictures of the tank: a) front view (white marks correspond to pressure sensor locations), b) front view (blue cards indicate the water content sensor locations and white cards are used for normalization of the photographs), c) back view with sensor cables and one overflow outlet.

### **3. Videos of both experiments**

A compilation of the photos made allowed creating videos of our two experiments. These videos are available at <https://zenodo.org/record/3462133>
